# Supplementary material for: Local and Global Order in Dense Packings of Semi-flexible Polymers of Hard Spheres
Source: Preprints.org preprint supplement (doi:10.20944/preprints202301.0026.v1), 2023-01-03
Supplement: Supplementary file 1 [file supplementary]

Archive with 1 entries (1 files):
- semiflexible_DMartinez_SI.pdf
